# Supplementary material for: Comparison of computational chemistry methods for the discovery of quinone-based electroactive compounds for energy storage
Source: PubMed Central journal article supplement (PMC7746720; doi:10.1038/s41598-020-79153-w), 2020-12-17
Supplement: 41598_2020_79153_MOESM1_ESM.pdf [file 41598_2020_79153_MOESM1_ESM.pdf]

# Supplementary Information

## Comparison of computational chemistry methods for the discovery of quinone-based electroactive compounds for energy storage

*Qi Zhang<sup>1,2,3</sup>, Abhishek Khetan<sup>1,2</sup>, Süleyman Er<sup>1,2\*</sup>*

<sup>1</sup> DIFFER – Dutch Institute for Fundamental Energy Research, De Zaale 20, 5612 AJ Eindhoven, The Netherlands

<sup>2</sup> CCER – Center for Computational Energy Research, De Zaale 20, 5612 AJ Eindhoven, The Netherlands

<sup>3</sup> Department of Applied Physics, Eindhoven University of Technology, 5600 MB Eindhoven, The Netherlands.

\* E-mail: [s.er@difffer.nl](mailto:s.er@difffer.nl)

### Explanation of the abbreviations used in the below tables:

SMILES: simplified molecular-input line-entry system

DFT: density functional theory

SEQM: semi-empirical quantum mechanics

DFTB: density functional tight-binding

FF: Force Field

OPT: geometry optimization

SPE: single-point energy

SOL : implicit aqueous medium

$R^2$ : the coefficient of fit

RMSE : the root mean squared error

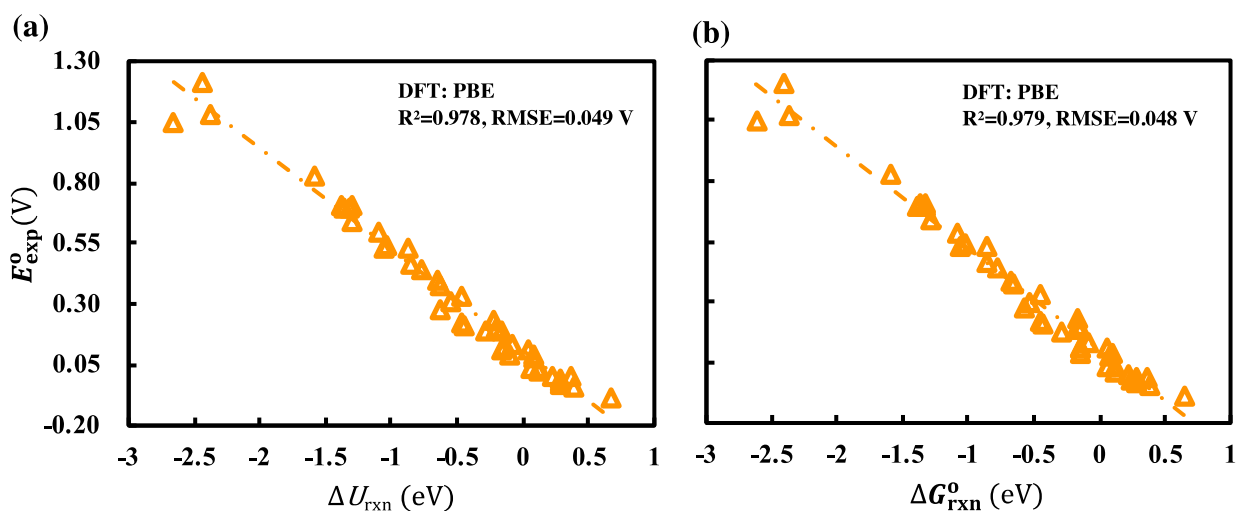

**Figure S1.** Performance of (a)  $\Delta U_{\text{rxn}}$  and (b)  $\Delta G_{\text{rxn}}^0$  descriptors for the prediction of experimentally measured redox potentials,  $E_{\text{exp}}^0$ . The DFT calculations were performed using the PBE functional.

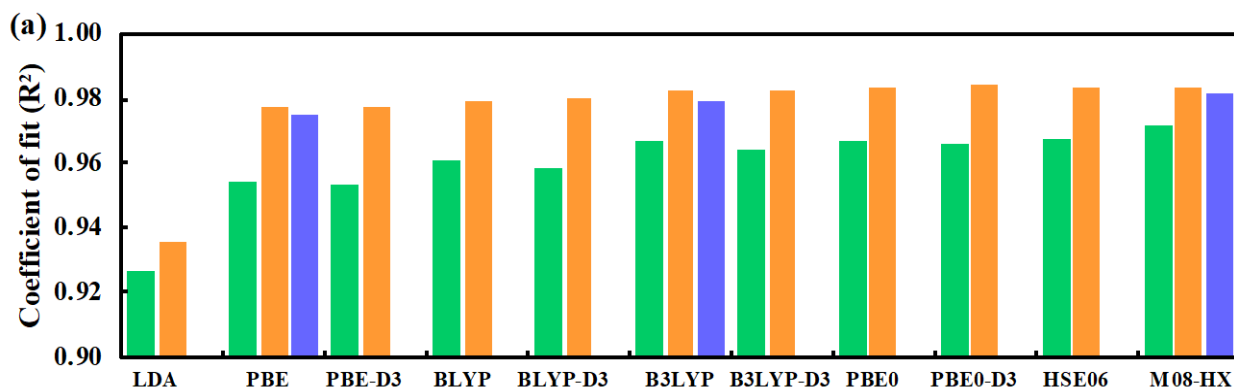

**Figure S2.** Performance comparisons of different DFT exchange-correlation functionals for the prediction of experimentally measured redox potentials,  $E_{\text{exp}}^0$ . The bar plot shows  $R^2$  values for all the functionals considered in this work. The color green represents both OPT and SPE in gas-phase, the color orange represents OPT in gas-phase followed by SPE with SOL (i.e., including implicit aqueous solvation), and color blue represents both OPT and SPE with SOL.

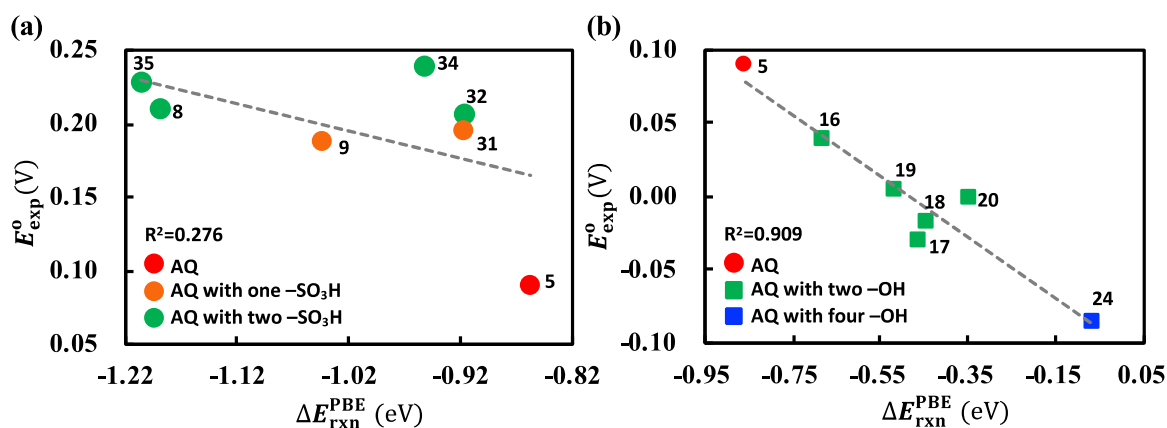

**Figure S3.** The effects of (a)  $-\text{SO}_3\text{H}$  and (b)  $-\text{OH}$  chemical functionalization groups on the redox potentials of anthraquinone-derivatives.

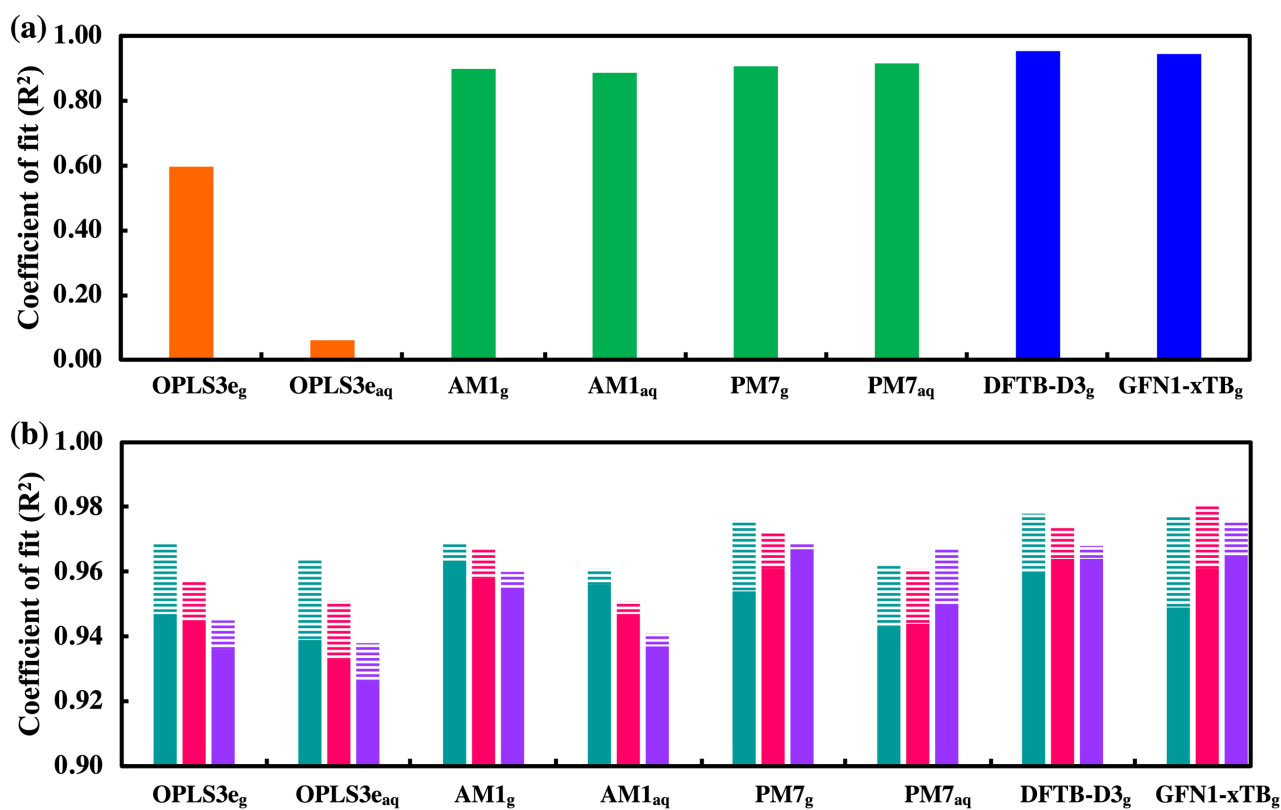

**Figure S4.** Performance comparisons of low-level methods: FF, SEQM and DFTB. (a) shows  $R^2$  for SPEs calculated at these three different levels of theory. Similarly, (b) shows  $R^2$  for DFT calculated SPE data on the geometries obtained from these three different levels of theory. In (b), the solid bars show SPE results without the implicit solvation effect, whereas the dashed bars show the results with the implicit solvation effects taken into account.

**Table S1.** A summary of 2D structures, SMILES representations, experimental and predicted redox potentials (V versus SHE) of the compounds.

| # | Molecule                                                                            | Smiles                                                                                                                   | $E_{\text{exp}}^{\circ}$ | $E_{\text{pre\_g}}^{\circ}$ | $E_{\text{pre\_s}}^{\circ}$ | $E_{\text{pre\_aq}}^{\circ}$ | Reference |
|---|-------------------------------------------------------------------------------------|--------------------------------------------------------------------------------------------------------------------------|--------------------------|-----------------------------|-----------------------------|------------------------------|-----------|
| 1 |    | <chem>O=C1C(=O)C=C</chem><br><chem>C=C1</chem>                                                                           | 0.831                    | 0.768                       | 0.764                       | 0.765                        | [4]       |
| 2 |    | <chem>O=C1C(=O)C=Cc</chem><br><chem>(c12)cccc2</chem>                                                                    | 0.547                    | 0.574                       | 0.535                       | 0.531                        | [4]       |
| 3 |    | <chem>O=C1C=CC(=O)</chem><br><chem>C=C1</chem>                                                                           | 0.699                    | 0.617                       | 0.671                       | 0.673                        | [4]       |
| 4 |    | <chem>O=C1C=CC(=O)c</chem><br><chem>(c12)cccc2</chem>                                                                    | 0.470                    | 0.436                       | 0.462                       | 0.460                        | [4]       |
| 5 |  | <chem>c1cccc(c12)C(=O)</chem><br><chem>c3c(C2=O)cccc3</chem>                                                             | 0.090                    | 0.178                       | 0.158                       | 0.155                        | [4]       |
| 6 |  | <chem>c1cccc(c12)c3c(C</chem><br><chem>(=O)C2=O)cccc3</chem>                                                             | 0.442                    | 0.477                       | 0.420                       | 0.418                        | [4]       |
| 7 |  | <chem>O=S(=O)(O)c(c1</chem><br><chem>O)ccc(c12)C(=O)</chem><br><chem>c3c(C2=O)ccc(c3</chem><br><chem>O)S(=O)(=O)O</chem> | 0.116                    | 0.246                       | 0.185                       | 0.154                        | [3]       |
| 8 |  | <chem>c1cc(S(=O)(=O)O</chem><br><chem>)cc(c12)C(=O)c3c</chem><br><chem>(C2=O)ccc(c3)S(</chem><br><chem>=O)(=O)O</chem>   | 0.21                     | 0.280                       | 0.294                       | 0.253                        | [1]       |
| 9 |  | <chem>c1cccc(C2=O)c1C</chem><br><chem>(=O)c(c23)cc(cc3)</chem><br><chem>S(=O)(=O)O</chem>                                | 0.187                    | 0.227                       | 0.234                       | 0.211                        | [1]       |

|    |                                                                                     |                                                                           |        |        |        |        |     |
|----|-------------------------------------------------------------------------------------|---------------------------------------------------------------------------|--------|--------|--------|--------|-----|
| 10 |    | <chem>c1cccc(C2=O)c1C(=O)c(c23)cc(S(=O)(=O)O)c(O)c3O</chem>               | 0.082  | 0.070  | 0.076  | 0.091  | [1] |
| 11 |    | <chem>c1cccc(C2=O)c1C(=O)c(c23)c(O)c(CS(=O)(=O)O)c(c3O)CS(=O)(=O)O</chem> | 0.02   | 0.061  | 0.046  | 0.053  | [1] |
| 12 |    | <chem>c1cc(S(=O)(=O)O)c(O)c(c12)C(=O)c3c(C2=O)ccc(c3O)S(=O)(=O)O</chem>   | 0.12   | 0.192  | 0.176  | 0.184  | [1] |
| 13 |   | <chem>Oc1c(S(=O)(=O)O)cc(O)c(c12)C(=O)c3c(C2=O)cccc3</chem>               | 0.09   | 0.076  | 0.074  | 0.055  | [3] |
| 14 |  | <chem>c1cccc(c12)C(=O)C(=C(C2=O)O)C=C(C)C</chem>                          | 0.333  | 0.297  | 0.291  | 0.306  | [2] |
| 15 |  | <chem>c1cccc(c12)C(=O)C(O)=CC2=O</chem>                                   | 0.308  | 0.274  | 0.333  | 0.332  | [2] |
| 16 |  | <chem>c1c(O)ccc(c12)C(=O)c3c(C2=O)ccc(c3)O</chem>                         | 0.039  | 0.122  | 0.087  | 0.088  | [2] |
| 17 |  | <chem>c1ccc(O)c(c12)C(=O)c3c(C2=O)ccc3O</chem>                            | -0.03  | -0.016 | -0.003 | -0.004 | [2] |
| 18 |  | <chem>Oc1cccc(c12)C(=O)c3c(C2=O)cccc3O</chem>                             | -0.017 | -0.046 | -0.010 | -0.010 | [2] |

|    |                                                                                     |                                                    |        |        |        |        |     |
|----|-------------------------------------------------------------------------------------|----------------------------------------------------|--------|--------|--------|--------|-----|
| 19 | 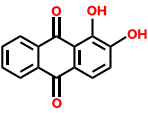   | Oc1c(O)ccc(c12)<br>C(=O)c3c(C2=O)<br>cccc3         | 0.005  | 0.015  | 0.020  | 0.017  | [2] |
| 20 |    | Oc1ccc(O)c(c12)<br>C(=O)c3c(C2=O)<br>cccc3         | -0.001 | -0.074 | -0.049 | -0.046 | [2] |
| 21 |    | c1ccc(O)c(c12)C(<br>=O)c3c(C2=O)cc(<br>C(=O)O)cc3O | 0.041  | 0.011  | 0.055  | 0.059  | [2] |
| 22 |    | c1ccc(O)c(c12)C(<br>=O)c3c(C2=O)cc(<br>CO)cc3O     | -0.008 | -0.025 | -0.008 | -0.039 | [2] |
| 23 |  | c1c(C)cc(O)c(c12)<br>)C(=O)c3c(C2=O)<br>cc(O)cc3O  | -0.040 | -0.061 | -0.047 | -0.041 | [2] |
| 24 |  | Oc1ccc(O)c(c12)<br>C(=O)c3c(C2=O)<br>ccc(O)c3O     | -0.084 | -0.197 | -0.165 | -0.165 | [2] |
| 25 |  | OC1=CC(=O)C(O)<br>)=CC1=O                          | 0.382  | 0.264  | 0.364  | 0.362  | [2] |
| 26 |  | O=C1C(F)=C(F)C<br>(=O)C(F)=C1F                     | 0.707  | 0.618  | 0.645  | 0.653  | [2] |
| 27 |  | O=C1C(O)=C(Cl)<br>C(=O)C(=C1Cl)O                   | 0.394  | 0.371  | 0.374  | 0.381  | [2] |

|    |                                                                                     |                                                |       |       |       |       |     |
|----|-------------------------------------------------------------------------------------|------------------------------------------------|-------|-------|-------|-------|-----|
| 28 | 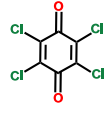   | <chem>O=C1C(Cl)=C(Cl)C(Cl)=C1Cl</chem>         | 0.700 | 0.641 | 0.653 | 0.659 | [2] |
| 29 |    | <chem>O=C1C(O)=C(O)C(O)=C1O</chem>             | 0.280 | 0.368 | 0.334 | 0.334 | [2] |
| 30 |    | <chem>O=S(=O)(O)CCSc1c(O)c(O)c(O)c(O)c1</chem> | 0.113 | 0.185 | 0.085 | 0.102 | [3] |
| 31 |   | <chem>O=S(=O)CCSc1c(O)c(O)c(O)c(O)c1</chem>    | 0.195 | 0.257 | 0.182 | 0.183 | [3] |
| 32 |  | <chem>O=S(=O)CCSc1c(O)c(O)c(O)c(O)c1</chem>    | 0.206 | 0.288 | 0.183 | 0.196 | [3] |
| 33 |  | <chem>O=S(=O)CCSc1c(O)c(O)c(O)c(O)c1</chem>    | 0.133 | 0.125 | 0.138 | 0.130 | [3] |
| 34 |  | <chem>O=S(=O)CCSc1c(O)c(O)c(O)c(O)c1</chem>    | 0.239 | 0.331 | 0.197 | 0.199 | [3] |
| 35 |  | <chem>O=S(=O)CCSc1c(O)c(O)c(O)c(O)c1</chem>    | 0.228 | 0.275 | 0.300 | 0.360 | [3] |

|    |                                                                                     |                                                                                 |       |       |       |       |     |
|----|-------------------------------------------------------------------------------------|---------------------------------------------------------------------------------|-------|-------|-------|-------|-----|
| 36 | 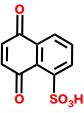   | <chem>c1ccc(S(=O)(=O)O)c(c12)C(=O)C=CC2=O</chem>                                | 0.532 | 0.509 | 0.478 | 0.504 | [3] |
| 37 |    | <chem>O=S(=O)(O)c(cc1)cc(c12)C(=O)C=CC2=O</chem>                                | 0.534 | 0.498 | 0.549 | 0.550 | [3] |
| 38 |    | <chem>O=C1C=CC(=O)C(O)=C1</chem>                                                | 0.594 | 0.487 | 0.559 | 0.560 | [3] |
| 39 |    | <chem>CC1=CC(=O)C=CC1=O</chem>                                                  | 0.641 | 0.593 | 0.643 | 0.640 | [3] |
| 40 |  | <chem>O=C1C=CC(=O)C(Cl)=C1</chem>                                               | 0.71  | 0.654 | 0.678 | 0.679 | [3] |
| 41 |  | <chem>O=c1c(=O)c(S(=O)(=O)O)cc(c2=O)c1c(=O)c(c23)cccc3</chem>                   | 1.21  | 1.098 | 1.119 | 1.072 | [3] |
| 42 |  | <chem>c1cccc(c12)c(=O)c3c(c2=O)c(=O)c(SCCS(=O)(=O)O)c(c3=O)SCCS(=O)(=O)O</chem> | 1.08  | 1.100 | 1.106 | 1.108 | [3] |
| 43 |  | <chem>O=c1c(S(=O)(=O)O)cc(=O)c(c2=O)c1c(=O)c(c23)cccc3</chem>                   | 1.05  | 1.239 | 1.222 | 1.228 | [3] |



**Table S2.** Performance comparisons of 11 different exchange-correlation functionals for the prediction of experimentally measured redox potentials. DFT<sub>g</sub> represents both OPT and SPE in the gas-phase; DFT<sub>s</sub> represents OPT in the gas-phase followed by SPE in SOL; DFT<sub>aq</sub> represents both OPT and SPE in SOL.

| Scheme for OPT and SPE | DFT <sub>g</sub> |          | DFT <sub>s</sub> |          | DFT <sub>aq</sub> |          |
|------------------------|------------------|----------|------------------|----------|-------------------|----------|
| DFT methods            | R <sup>2</sup>   | RMSE (V) | R <sup>2</sup>   | RMSE (V) | R <sup>2</sup>    | RMSE (V) |
| LDA                    | 0.926            | 0.091    | 0.935            | 0.085    | -                 | -        |
| PBE                    | 0.954            | 0.072    | 0.977            | 0.051    | 0.975             | 0.053    |
| PBE-D3                 | 0.953            | 0.073    | 0.977            | 0.050    | -                 | -        |
| BLYP                   | 0.960            | 0.067    | 0.979            | 0.048    | -                 | -        |
| BLYP-D3                | 0.958            | 0.068    | 0.980            | 0.047    | -                 | -        |
| B3LYP                  | 0.966            | 0.062    | 0.982            | 0.045    | 0.979             | 0.049    |
| B3LYP-D3               | 0.964            | 0.064    | 0.982            | 0.045    | -                 | -        |
| PBE0                   | 0.966            | 0.062    | 0.983            | 0.043    | -                 | -        |
| PBE0-D3                | 0.965            | 0.063    | 0.984            | 0.043    | -                 | -        |
| HSE06                  | 0.967            | 0.061    | 0.983            | 0.044    | -                 | -        |
| M08-HX                 | 0.971            | 0.057    | 0.983            | 0.044    | 0.981             | 0.047    |

**Table S3.** Performance comparisons of nine different SEQM methods for the prediction of experimentally measured redox potentials. SEQM<sub>g</sub> represents OPT or SPE in gas-phase. PBE<sub>g</sub>, B3LYP<sub>g</sub> and M08-HX<sub>g</sub>, represent SPE calculations in gas-phase using these three exchange-correlation functionals.

| Scheme for<br>OPT and SPE | OPT:SEQM <sub>g</sub><br>SPE:SEQM <sub>g</sub> |         | OPT:SEQM <sub>g</sub><br>SPE:PBE <sub>g</sub> |         | OPT:SEQM <sub>g</sub><br>SPE:B3LYP <sub>g</sub> |         | OPT:SEQM <sub>g</sub><br>SPE:M08-HX <sub>g</sub> |         |
|---------------------------|------------------------------------------------|---------|-----------------------------------------------|---------|-------------------------------------------------|---------|--------------------------------------------------|---------|
|                           | R <sup>2</sup>                                 | RMSE(V) | R <sup>2</sup>                                | RMSE(V) | R <sup>2</sup>                                  | RMSE(V) | R <sup>2</sup>                                   | RMSE(V) |
| AM1                       | 0.899                                          | 0.107   | 0.963                                         | 0.064   | 0.958                                           | 0.068   | 0.955                                            | 0.071   |
| MNDO                      | 0.773                                          | 0.159   | 0.840                                         | 0.134   | 0.852                                           | 0.129   | 0.860                                            | 0.125   |
| MNDOD                     | 0.748                                          | 0.168   | 0.847                                         | 0.131   | 0.860                                           | 0.125   | 0.867                                            | 0.122   |
| PM3                       | 0.864                                          | 0.123   | 0.952                                         | 0.073   | 0.957                                           | 0.070   | 0.956                                            | 0.070   |
| PM6                       | 0.863                                          | 0.124   | 0.928                                         | 0.090   | 0.916                                           | 0.097   | 0.891                                            | 0.111   |
| PM6-D3                    | 0.870                                          | 0.121   | 0.919                                         | 0.095   | 0.907                                           | 0.102   | 0.895                                            | 0.108   |
| PM6-D3H4X                 | 0.877                                          | 0.117   | 0.947                                         | 0.077   | 0.943                                           | 0.080   | 0.933                                            | 0.087   |
| PM7                       | 0.906                                          | 0.103   | 0.954                                         | 0.072   | 0.961                                           | 0.066   | 0.967                                            | 0.061   |
| RM1                       | 0.846                                          | 0.131   | 0.958                                         | 0.069   | 0.956                                           | 0.071   | 0.952                                            | 0.074   |

**Table S4.** Performance comparisons of nine different SEQM methods for the prediction of experimentally measured redox potentials. SEQM<sub>g</sub> represents OPT or SPE in gas-phase. PBE<sub>s</sub>, B3LYP<sub>s</sub> and M08-HX<sub>s</sub>, represent SPE calculations in SOL using these three exchange-correlation functionals.

| Scheme for<br>OPT and SPE | OPT:SEQM <sub>g</sub><br>SPE:SEQM <sub>g</sub> |         | OPT: SEQM <sub>g</sub><br>SPE: PBE <sub>s</sub> |         | OPT: SEQM <sub>g</sub><br>SPE: B3LYP <sub>s</sub> |         | OPT: SEQM <sub>g</sub><br>SPE: M08-HX <sub>s</sub> |         |
|---------------------------|------------------------------------------------|---------|-------------------------------------------------|---------|---------------------------------------------------|---------|----------------------------------------------------|---------|
|                           | R <sup>2</sup>                                 | RMSE(V) | R <sup>2</sup>                                  | RMSE(V) | R <sup>2</sup>                                    | RMSE(V) | R <sup>2</sup>                                     | RMSE(V) |
| AM1                       | 0.899                                          | 0.107   | 0.969                                           | 0.059   | 0.967                                             | 0.061   | 0.960                                              | 0.067   |
| MNDO                      | 0.773                                          | 0.159   | 0.892                                           | 0.110   | 0.902                                             | 0.105   | 0.906                                              | 0.102   |
| MNDOD                     | 0.748                                          | 0.168   | 0.888                                           | 0.112   | 0.898                                             | 0.107   | 0.902                                              | 0.105   |
| PM3                       | 0.864                                          | 0.123   | 0.975                                           | 0.053   | 0.976                                             | 0.052   | 0.974                                              | 0.054   |
| PM6                       | 0.863                                          | 0.124   | 0.916                                           | 0.097   | 0.892                                             | 0.110   | 0.849                                              | 0.130   |
| PM6-D3                    | 0.870                                          | 0.121   | 0.920                                           | 0.095   | 0.880                                             | 0.116   | 0.867                                              | 0.122   |
| PM6-D3H4X                 | 0.877                                          | 0.117   | 0.949                                           | 0.076   | 0.931                                             | 0.088   | 0.905                                              | 0.103   |
| PM7                       | 0.906                                          | 0.103   | 0.976                                           | 0.051   | 0.972                                             | 0.056   | 0.969                                              | 0.059   |
| RM1                       | 0.846                                          | 0.131   | 0.959                                           | 0.068   | 0.953                                             | 0.072   | 0.940                                              | 0.082   |

**Table S5.** Performance comparisons of nine different SEQM methods for the prediction of experimentally measured redox potentials.  $\text{SEQM}_{\text{aq}}$  represents OPT or SPE in SOL.  $\text{PBE}_{\text{g}}$ ,  $\text{B3LYP}_{\text{g}}$  and  $\text{M08-HX}_{\text{g}}$ , represent SPE calculations in gas-phase with three exchange-correlation functionals.

| Scheme for<br>OPT and SPE | OPT: $\text{SEQM}_{\text{aq}}$<br>SPE: $\text{SEQM}_{\text{aq}}$ |         | OPT: $\text{SEQM}_{\text{aq}}$<br>SPE: $\text{PBE}_{\text{g}}$ |         | OPT: $\text{SEQM}_{\text{aq}}$<br>SPE: $\text{B3LYP}_{\text{g}}$ |         | OPT: $\text{SEQM}_{\text{aq}}$<br>SPE: $\text{M08-HX}_{\text{g}}$ |         |
|---------------------------|------------------------------------------------------------------|---------|----------------------------------------------------------------|---------|------------------------------------------------------------------|---------|-------------------------------------------------------------------|---------|
|                           | $R^2$                                                            | RMSE(V) | $R^2$                                                          | RMSE(V) | $R^2$                                                            | RMSE(V) | $R^2$                                                             | RMSE(V) |
| AM1                       | 0.886                                                            | 0.113   | 0.956                                                          | 0.070   | 0.947                                                            | 0.077   | 0.937                                                             | 0.084   |
| MNDO                      | 0.394                                                            | 0.261   | 0.654                                                          | 0.197   | 0.649                                                            | 0.198   | 0.563                                                             | 0.221   |
| MNDOD                     | 0.820                                                            | 0.142   | 0.772                                                          | 0.160   | 0.793                                                            | 0.152   | 0.812                                                             | 0.145   |
| PM3                       | 0.861                                                            | 0.125   | 0.925                                                          | 0.092   | 0.930                                                            | 0.089   | 0.930                                                             | 0.088   |
| PM6                       | 0.927                                                            | 0.090   | 0.919                                                          | 0.095   | 0.919                                                            | 0.095   | 0.914                                                             | 0.098   |
| PM6-D3                    | 0.926                                                            | 0.091   | 0.934                                                          | 0.086   | 0.925                                                            | 0.092   | 0.919                                                             | 0.095   |
| PM6-D3H4X                 | 0.909                                                            | 0.101   | 0.929                                                          | 0.089   | 0.923                                                            | 0.093   | 0.918                                                             | 0.096   |
| PM7                       | 0.915                                                            | 0.098   | 0.943                                                          | 0.080   | 0.944                                                            | 0.079   | 0.950                                                             | 0.075   |
| RM1                       | 0.869                                                            | 0.121   | 0.928                                                          | 0.090   | 0.928                                                            | 0.090   | 0.923                                                             | 0.093   |

**Table S6.** Performance comparisons of nine different SEQM methods for the prediction of experimentally measured redox potentials. SEQM<sub>aq</sub> represents OPT or SPE in SOL. PBE<sub>s</sub>, B3LYP<sub>s</sub> and M08-HX<sub>s</sub>, represent SPE calculations in SOL with three exchange-correlation functionals.

| Scheme for<br>OPT and SPE | OPT:SEQM <sub>aq</sub><br>SPE:SEQM <sub>aq</sub> |          | OPT: SEQM <sub>aq</sub><br>SPE: PBE <sub>s</sub> |         | OPT: SEQM <sub>aq</sub><br>SPE: B3LYP <sub>s</sub> |         | OPT: SEQM <sub>aq</sub><br>SPE: M08-HX <sub>s</sub> |         |
|---------------------------|--------------------------------------------------|----------|--------------------------------------------------|---------|----------------------------------------------------|---------|-----------------------------------------------------|---------|
|                           | R <sup>2</sup>                                   | RMSE (V) | R <sup>2</sup>                                   | RMSE(V) | R <sup>2</sup>                                     | RMSE(V) | R <sup>2</sup>                                      | RMSE(V) |
| AM1                       | 0.886                                            | 0.113    | 0.961                                            | 0.066   | 0.951                                              | 0.074   | 0.941                                               | 0.082   |
| MNDO                      | 0.394                                            | 0.261    | 0.815                                            | 0.144   | 0.796                                              | 0.151   | 0.846                                               | 0.131   |
| MNDOD                     | 0.820                                            | 0.142    | 0.870                                            | 0.121   | 0.886                                              | 0.113   | 0.901                                               | 0.105   |
| PM3                       | 0.861                                            | 0.125    | 0.957                                            | 0.069   | 0.963                                              | 0.065   | 0.965                                               | 0.062   |
| PM6                       | 0.927                                            | 0.090    | 0.940                                            | 0.082   | 0.938                                              | 0.084   | 0.926                                               | 0.091   |
| PM6-D3                    | 0.926                                            | 0.091    | 0.953                                            | 0.073   | 0.940                                              | 0.082   | 0.927                                               | 0.090   |
| PM6-D3H4X                 | 0.909                                            | 0.101    | 0.948                                            | 0.076   | 0.941                                              | 0.081   | 0.937                                               | 0.084   |
| PM7                       | 0.915                                            | 0.098    | 0.962                                            | 0.065   | 0.961                                              | 0.066   | 0.967                                               | 0.060   |
| RM1                       | 0.869                                            | 0.121    | 0.947                                            | 0.077   | 0.944                                              | 0.079   | 0.928                                               | 0.090   |

**Table S7.** Performance comparisons of FF(OPLS3e) in combination with different DFT methods for the prediction of experimentally measured redox potentials. FF<sub>g</sub> represents OPT or SPE in gas-phase. FF<sub>aq</sub> represents OPT or SPE in SOL. PBE<sub>g</sub>, B3LYP<sub>g</sub> and M08-HX<sub>g</sub>, represent SPE calculations in gas-phase with three DFT functionals. PBE<sub>s</sub>, B3LYP<sub>s</sub> and M08-HX<sub>s</sub> represent SPE calculation in SOL with three exchange-correlation functionals.

|                           |                                              |         |                                                |         |                                                  |         |                                                   |         |
|---------------------------|----------------------------------------------|---------|------------------------------------------------|---------|--------------------------------------------------|---------|---------------------------------------------------|---------|
| Scheme for<br>OPT and SPE | OPT:FF <sub>g</sub><br>SPE:FF <sub>g</sub>   |         | OPT: FF <sub>g</sub><br>SPE: PBE <sub>g</sub>  |         | OPT: FF <sub>g</sub><br>SPE: B3LYP <sub>g</sub>  |         | OPT: FF <sub>g</sub><br>SPE: M08-HX <sub>g</sub>  |         |
| Method                    | R <sup>2</sup>                               | RMSE(V) | R <sup>2</sup>                                 | RMSE(V) | R <sup>2</sup>                                   | RMSE(V) | R <sup>2</sup>                                    | RMSE(V) |
| OPLS3e                    | 0.596                                        | 0.213   | 0.947                                          | 0.077   | 0.945                                            | 0.079   | 0.936                                             | 0.085   |
| Scheme for<br>OPT and SPE | OPT:FF <sub>g</sub><br>SPE:FF <sub>g</sub>   |         | OPT: FF <sub>g</sub><br>SPE: PBE <sub>s</sub>  |         | OPT: FF <sub>g</sub><br>SPE: B3LYP <sub>s</sub>  |         | OPT: FF <sub>g</sub><br>SPE: M08-HX <sub>s</sub>  |         |
| Method                    | R <sup>2</sup>                               | RMSE(V) | R <sup>2</sup>                                 | RMSE(V) | R <sup>2</sup>                                   | RMSE(V) | R <sup>2</sup>                                    | RMSE(V) |
| OPLS3e                    | 0.596                                        | 0.213   | 0.969                                          | 0.059   | 0.957                                            | 0.070   | 0.945                                             | 0.078   |
| Scheme for<br>OPT and SPE | OPT:FF <sub>aq</sub><br>SPE:FF <sub>aq</sub> |         | OPT: FF <sub>aq</sub><br>SPE: PBE <sub>g</sub> |         | OPT: FF <sub>aq</sub><br>SPE: B3LYP <sub>g</sub> |         | OPT: FF <sub>aq</sub><br>SPE: M08-HX <sub>g</sub> |         |
| Method                    | R <sup>2</sup>                               | RMSE(V) | R <sup>2</sup>                                 | RMSE(V) | R <sup>2</sup>                                   | RMSE(V) | R <sup>2</sup>                                    | RMSE(V) |
| OPLS3e                    | 0.06                                         | 0.325   | 0.939                                          | 0.083   | 0.933                                            | 0.087   | 0.926                                             | 0.091   |
| Scheme for<br>OPT and SPE | OPT:FF <sub>aq</sub><br>SPE:FF <sub>aq</sub> |         | OPT: FF <sub>aq</sub><br>SPE: PBE <sub>s</sub> |         | OPT: FF <sub>aq</sub><br>SPE: B3LYP <sub>s</sub> |         | OPT: FF <sub>aq</sub><br>SPE: M08-HX <sub>s</sub> |         |
| Method                    | R <sup>2</sup>                               | RMSE(V) | R <sup>2</sup>                                 | RMSE(V) | R <sup>2</sup>                                   | RMSE(V) | R <sup>2</sup>                                    | RMSE(V) |
| OPLS3e                    | 0.06                                         | 0.325   | 0.964                                          | 0.063   | 0.951                                            | 0.074   | 0.938                                             | 0.083   |

**Table S8.** Performance comparisons of two different DFTB methods for the prediction of experimentally measured redox potentials. DFTB<sub>g</sub> represents OPT or SPE in gas-phase. PBE<sub>g</sub>, B3LYP<sub>g</sub> and M08-HX<sub>g</sub>, represent SPE calculations in gas-phase with three exchange-correlation functionals.

| Scheme for<br>OPT and SPE | OPT:DFTB <sub>g</sub><br>SPE:DFTB <sub>g</sub> |         | OPT: DFTB <sub>g</sub><br>SPE: PBE <sub>g</sub> |         | OPT: DFTB <sub>g</sub><br>SPE: B3LYP <sub>g</sub> |         | OPT: DFTB <sub>g</sub><br>SPE: M08-HX <sub>g</sub> |         |
|---------------------------|------------------------------------------------|---------|-------------------------------------------------|---------|---------------------------------------------------|---------|----------------------------------------------------|---------|
|                           | R <sup>2</sup>                                 | RMSE(V) | R <sup>2</sup>                                  | RMSE(V) | R <sup>2</sup>                                    | RMSE(V) | R <sup>2</sup>                                     | RMSE(V) |
| DFTB-D3                   | 0.953                                          | 0.072   | 0.960                                           | 0.067   | 0.964                                             | 0.063   | 0.964                                              | 0.063   |
| GFN1-xTB                  | 0.944                                          | 0.079   | 0.949                                           | 0.075   | 0.961                                             | 0.066   | 0.965                                              | 0.062   |

**Table S9.** Performance comparisons of two different DFTB methods for the prediction of experimentally measured redox potentials. DFTB<sub>g</sub> represents OPT or SPE in gas-phase. PBE<sub>s</sub>, B3LYP<sub>s</sub> and M08-HX<sub>s</sub>, represent SPE calculations in SOL with three exchange-correlation functionals.

| Scheme for<br>OPT and SPE | OPT:DFTB <sub>g</sub><br>SPE:DFTB <sub>g</sub> |         | OPT: DFTB <sub>g</sub><br>SPE: PBE <sub>s</sub> |         | OPT: DFTB <sub>g</sub><br>SPE: B3LYP <sub>s</sub> |         | OPT: DFTB <sub>g</sub><br>SPE: M08-HX <sub>s</sub> |         |
|---------------------------|------------------------------------------------|---------|-------------------------------------------------|---------|---------------------------------------------------|---------|----------------------------------------------------|---------|
|                           | R <sup>2</sup>                                 | RMSE(V) | R <sup>2</sup>                                  | RMSE(V) | R <sup>2</sup>                                    | RMSE(V) | R <sup>2</sup>                                     | RMSE(V) |
| DFTB-D3                   | 0.953                                          | 0.072   | 0.978                                           | 0.049   | 0.974                                             | 0.054   | 0.968                                              | 0.060   |
| GFN1-xTB                  | 0.944                                          | 0.079   | 0.977                                           | 0.051   | 0.981                                             | 0.046   | 0.976                                              | 0.052   |

## References for Supporting Information

- Gerhardt, M. R. et al. Anthraquinone Derivatives in Aqueous Flow Batteries. *Adv. Energy Mater.* **7**, 1601488 (2017).
- Wedeg, K., Dražević, E., Konya, D. & Bientien, A. Organic Redox Species in Aqueous Flow Batteries: Redox Potentials, Chemical Stability and Solubility. *Sci. Rep.* **6**, 1–13 (2016).
- Tabor, D. P. et al. Mapping the frontiers of quinone stability in aqueous media: implications for organic aqueous redox flow batteries. *J. Mater. Chem. A* **7**, 12833–12841 (2019).
- Tobias Johnsson Wass, J. R., Ahlberg, E., Panas, I. & Schiffrin, D. J. Quantum chemical modeling of the reduction of quinones. *J. Phys. Chem. A* **110**, 2005–2020 (2006).
